# Supplementary material
Source: PubMed Central journal article supplement (PMC3804226)
Supplement: Supp_Fig1.pdf [file Supp_Fig1.pdf]

## Supplementary Data

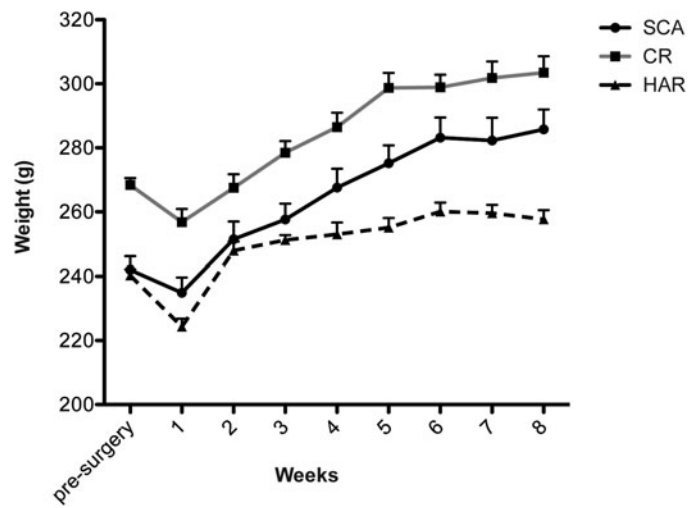

**SUPPLEMENTARY FIG. 1.** Substrain weights were measured once a week for the 8-week experimental period. The Harlan (HAR) animals seem to have a weight curve that levels off earlier than Scanbur (SCA) and Charles River (CR) rats.
