# Supplementary material
Source: PubMed Central journal article supplement (PMC3804226)
Supplement: Supp_Fig2.pdf [file Supp_Fig2.pdf]

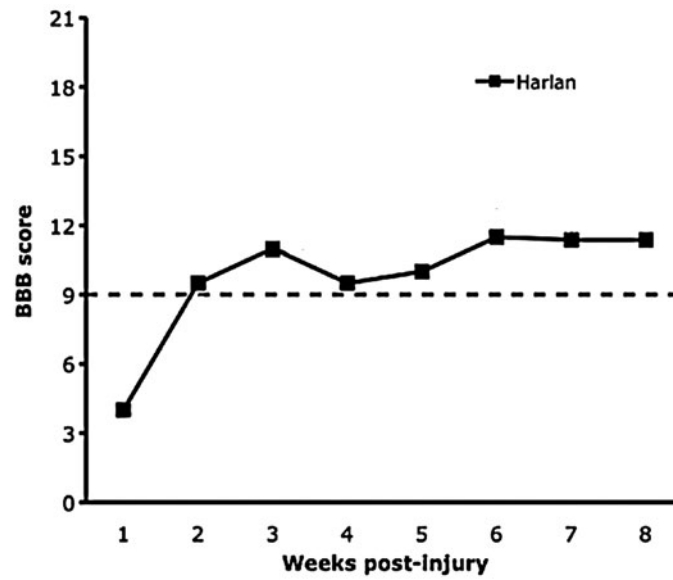

**SUPPLEMENTARY FIG. 2.** Harlan rats regain weight support ability after moderate injury. The Harlan rat substrain generally reaches a Basso, Beattie, Bresnahan (BBB) score higher than 9, which is the threshold for weight supported stance in the BBB scoring system (the data are from a control group from an unpublished experiment).
